# Supplementary material for: Drp1-mediated mitochondrial fission promotes cell proliferation through crosstalk of p53 and NF-κB pathways in hepatocellular carcinoma
Source: PubMed Central journal article supplement (PMC5323133; doi:10.18632/oncotarget.11339), 2016-08-17
Supplement: oncotarget-07-65001-s001.pdf [file oncotarget-07-65001-s001.pdf]

# Drp1-mediated mitochondrial fission promotes cell proliferation through crosstalk of p53 and NF- $\kappa$ B pathways in hepatocellular carcinoma

## Supplementary Materials

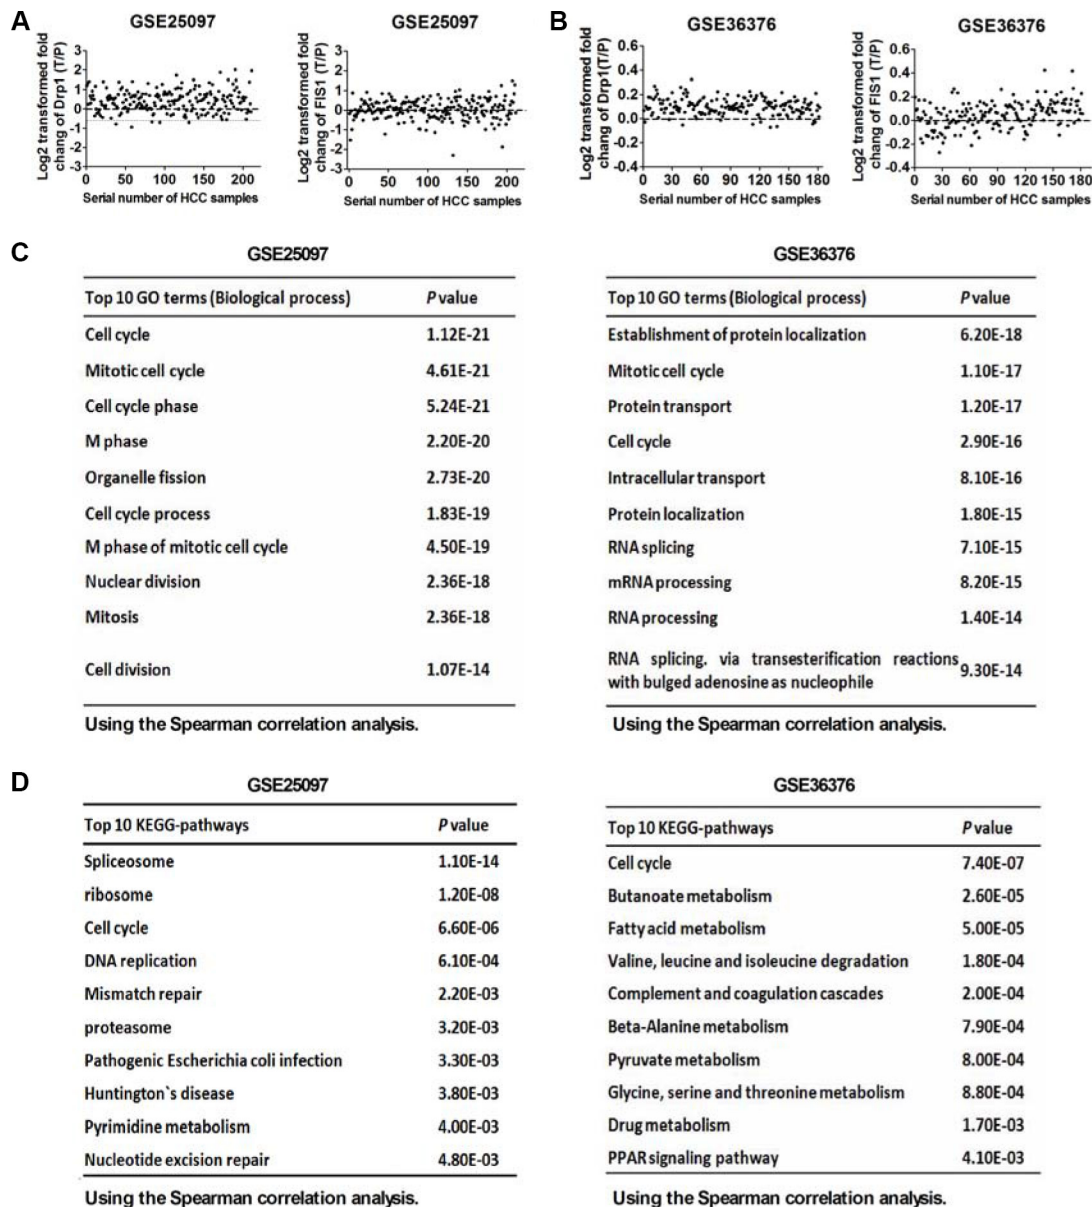

**Supplementary Figure S1: Functional association and pathway analysis of Drp1 correlated genes in HCC.** (A and B) Drp1 and FIS1 mRNA expression in paired HCC tissues were analyzed based on RNA-seq data of two largest public microarray mRNA expression datasets (GSE25097 and GSE36376) from GEO (Gene Expression Omnibus) database. The relative expression ratio of tumor to peritumor was  $\log_2$ -transformed. The data was displayed according to serial patient ID number. T: tumor; P: peritumor. (C and D) Gene Ontology (GO) categories and Kyoto Encyclopedia of Genes and Genomes (KEGG) pathway enrichment analysis using the online DAVID tool for genes which were significantly correlated with Drp1.

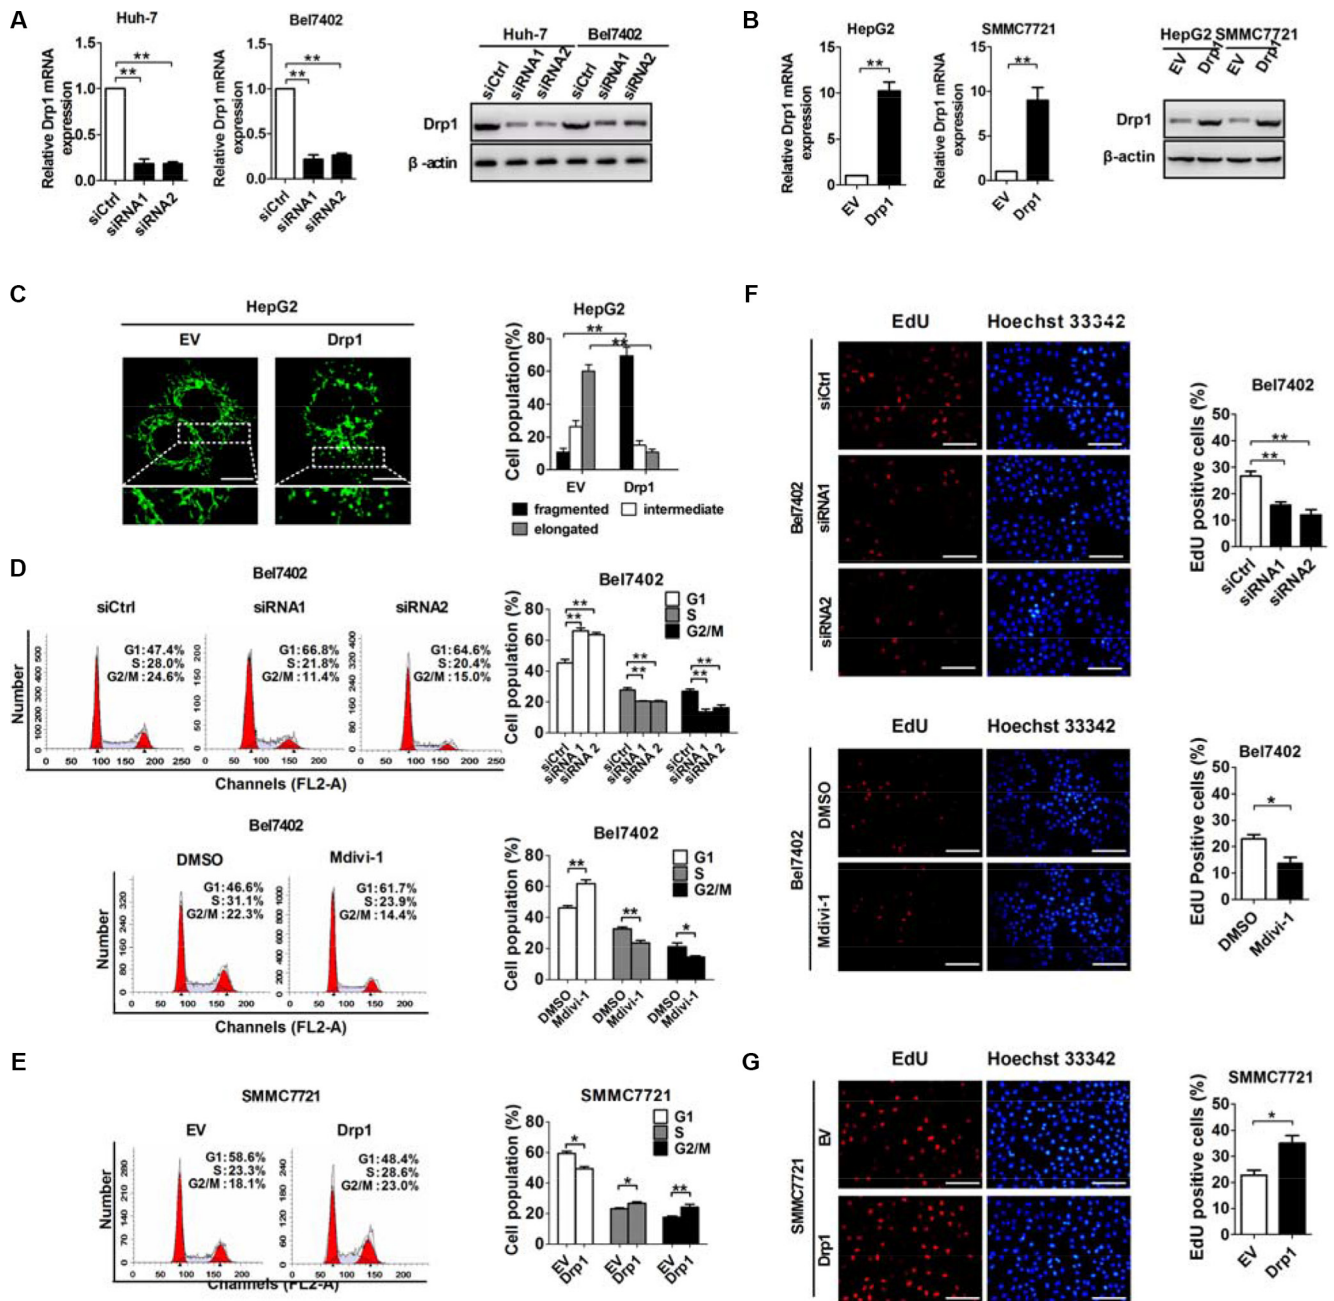

**Supplementary Figure S2: Drp1-mediated mitochondrial fission promoted proliferation of HCC cells *in vitro*.** (A and B) qRT-PCR and Western blot analyses for Drp1 expression were performed in Huh-7, Bel7402, HepG2 and SMMC7721 cells 48 h after treatment with siRNA or expression vector as indicated. siRNA1 and siRNA2: siRNAs against Drp1. siCtrl: control siRNA. Drp1: expression vector encoding Drp1. EV: empty vector. (C) Confocal microscope analysis of mitochondrial network in HepG2 cells ( $n = 50$  cells for each sample) 48 h after treatment with expression vector as indicated. Scale bars, 5  $\mu$ m. The bottoms below are the enlarged views of the dotted rectangle areas in the upper images. (D and E) Cell cycle analysis by flow cytometry in Bel7402 and SMMC7721 cells with treatment as indicated. (F and G) Cell proliferation was evaluated by EdU incorporation assay in Bel7402 and SMMC7721 cells with treatment as indicated. Scale bar, 50  $\mu$ m. The data shown are the mean  $\pm$  SEM from three separate experiments. \* $P < 0.05$ ; \*\* $P < 0.01$ .

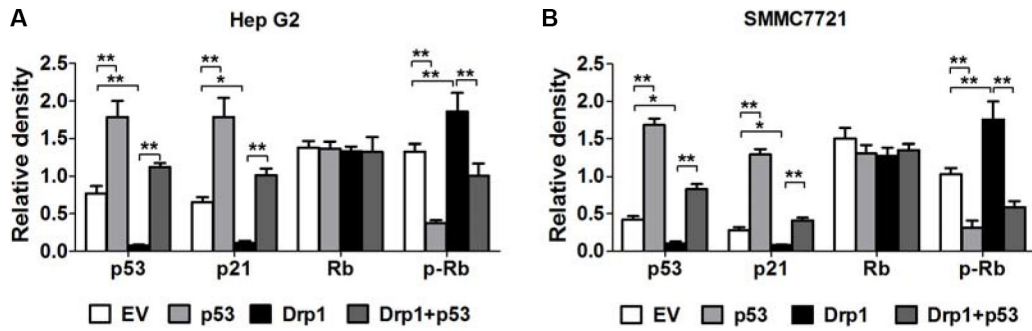

**Supplementary Figure S3: Quantification of Western blot analysis for cell cycle-related genes in Figure 3A and 3B.** The data shown are the mean  $\pm$  SEM from three separate experiments. \* $P < 0.05$ ; \*\* $P < 0.01$ .

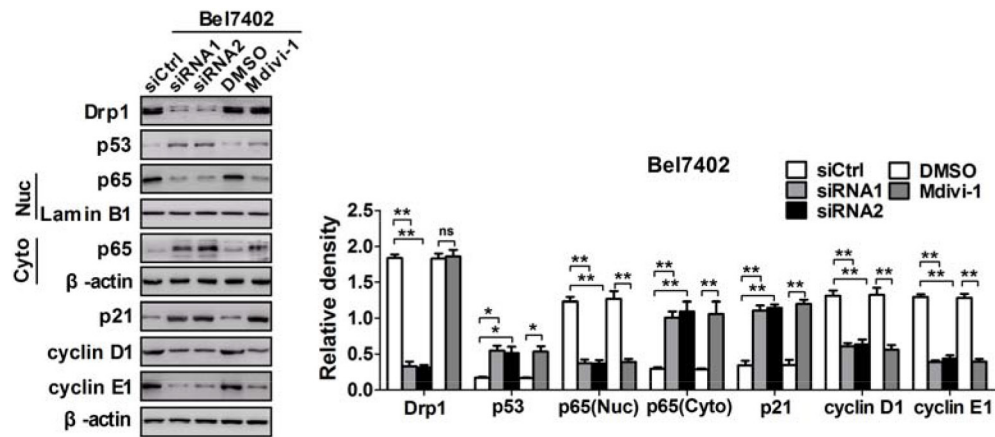

**Supplementary Figure S4: Decreased mitochondrial fission inhibited cell cycle progression of HCC cells through regulating NF- $\kappa$ B and p53 pathways.** Western blot analyses for protein levels of Drp1, cell cycle-related molecules p21, cyclin D1, cyclin E1 and p53 in whole-cells or p65 in cytoplasm and nucleus in Bel7402 cells with treatment as indicated. Quantification of Western blot analysis was shown in the right. The data shown are the mean  $\pm$  SEM from three separate experiments. \* $P < 0.05$ ; \*\* $P < 0.01$ .

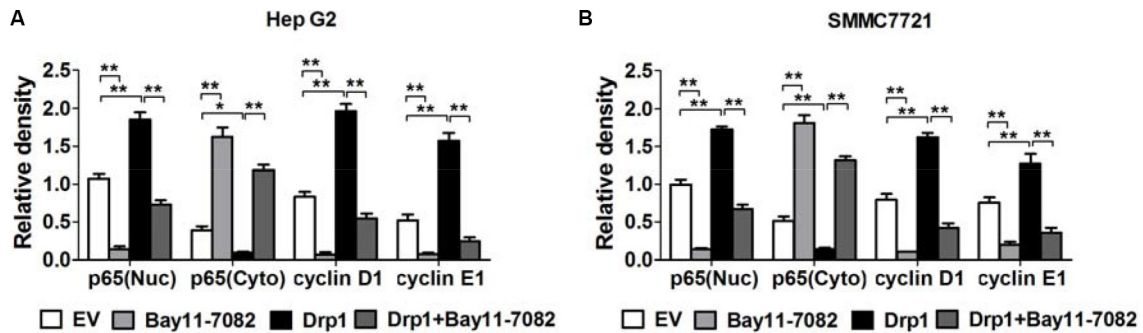

**Supplementary Figure S5: Quantification of Western blot analysis for p65, cyclin D1 and cyclin E1 in Figure 4A and 4B.** The data shown are the mean  $\pm$  SEM from three separate experiments. \* $P < 0.05$ ; \*\* $P < 0.01$ .

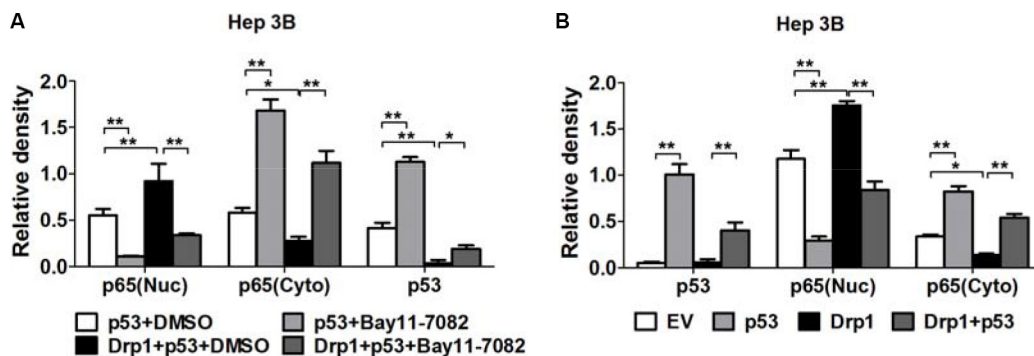

**Supplementary Figure S6: Quantification of Western blot analysis for p53 and p65 in Figure 5A and 5B.** The data shown are the mean  $\pm$  SEM from three separate experiments. \* $P < 0.05$ ; \*\* $P < 0.01$ .

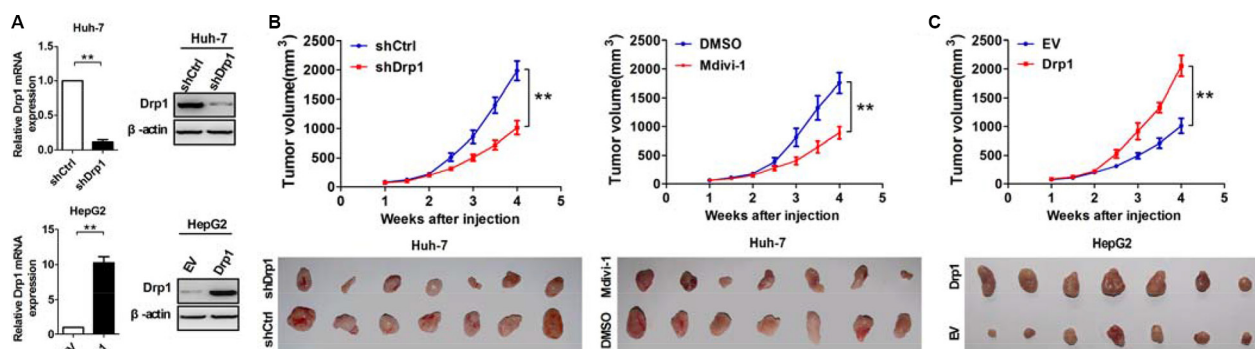

**Supplementary Figure S7: Drp1-mediated mitochondrial fission promoted proliferation of HCC cells *in vivo*.** (A) qRT-PCR and Western blot analyses for Drp1 expression were performed in Huh-7 and HepG2 cells stably transfected with shRNA or force-expression vector of Drp1 as indicated. (B and C) Tumor growth curves of subcutaneous xenograft tumor model developed from HCC cells which were stably transfected with shRNA or force-expression vector of Drp1 as indicated (both  $n = 7$ ). Huh-7 cells tumor-bearing mice were also treated with Mdivi-1 (0.75 mg/tumor) or DMSO by intratumor injection. Tumor size, including tumor length (L) and width (W), was measured using vernier calipers twice a week from day 7 after transplantation. The tumor volumes were calculated according to the formula  $(L \times W^2)/2$  and presented as mean  $\pm$  SEM. Tumors from sacrificed mice were dissected 4 weeks after transplantation and also shown in lower panel. shDrp1: shRNA expression vector against Drp1. shCtrl: control shRNA. Drp1: expression vector encoding Drp1. EV: empty vector.



**Supplementary Table S1: Primary antibodies used for Western blot and immunohistochemistry**

| Antibody       | Company (Cat. No.)           | Working dilutions |
|----------------|------------------------------|-------------------|
| Drp1           | abcam (ab56788)              | WB: 1/800         |
| $\beta$ -actin | Beijing TDY BIOTEC (TDY051C) | WB: 1/3000        |
| p65            | abcam(ab7970)                | WB: 1/1000        |
| Lamin B1       | Beijing TDY BIOTEC (TDY049)  | WB: 1/2000        |
| p53            | Cell Signaling (#9282)       | WB: 1/500         |
| p21            | Proteintech (10355-1-AP)     | WB: 1/1000        |
| Rb             | Proteintech (17218-1-AP)     | WB: 1/1000        |
| p-Rb           | SAB (11132)                  | WB: 1/500         |
| cyclin D1      | Proteintech (60186-1-Ig)     | WB: 1/2000        |
| cyclin E1      | Proteintech (11554-1-AP)     | WB: 1/1000        |
| Ki-67          | ZSGB-BIO (ZA-0502)           | IHC: 1/10000      |

**Supplementary Table S2: Public datasets used for bioinformatic analysis in the study**

| Data source    | Platform                                    | Probes/Genes | Paired HCC Sample No. | Patient Ethnicity                                                         | Etiology | Source URL                                                                                                                          |
|----------------|---------------------------------------------|--------------|-----------------------|---------------------------------------------------------------------------|----------|-------------------------------------------------------------------------------------------------------------------------------------|
| TCGA           | Illumina HiSeq_RNASeqV2                     | - /20531     | 50                    | Asian, white, black or African american, American indian or alaska native | -        | <a href="http://cancergenome.nih.gov">http://cancergenome.nih.gov</a>                                                               |
| GEO (GSE36376) | Illumina HumanHT-12V4.0 Expression beadchip | 47324 /18077 | 182                   | Korean                                                                    | -        | <a href="http://www.ncbi.nlm.nih.gov/geo/query/acc.cgi?acc=GSE36376">http://www.ncbi.nlm.nih.gov/geo/query/acc.cgi?acc=GSE36376</a> |
| GEO (GSE25097) | Rosetta/Merck Human RSTA Affymetrix1.0      | 37634 /18077 | 211                   | Chinese                                                                   | HBV      | <a href="http://www.ncbi.nlm.nih.gov/geo/query/acc.cgi?acc=GSE25097">http://www.ncbi.nlm.nih.gov/geo/query/acc.cgi?acc=GSE25097</a> |

### Supplementary Table S3: Sequence of primers

---

#### Primers used in q-PCR analysis

---

|           |                |                         |
|-----------|----------------|-------------------------|
| Drp1      | forward primer | GGAGACTCATCTTTGGTGAAGAG |
|           | reverse primer | AAGGAGCCAGTCAAATTATTGC  |
| p21       | forward primer | CGATGGAACTTCGACTTTGTCA  |
|           | reverse primer | GCACAAGGGTACAAGACAGTG   |
| cyclin D1 | forward primer | GCTGCGAAGTGGAAACCATC    |
|           | reverse primer | CCTCCTTCTGCACACATTTGAA  |
| cyclin E1 | forward primer | AAGGAGCGGGACACCATGA     |
|           | reverse primer | ACGGTCACGTTTGCCTTCC     |
| GAPDH     | forward primer | GGAGCGAGATCCCTCCAAAAT   |
|           | reverse primer | GGCTGTTGTCATACTTCTCATGG |

---

**Supplementary Table S4: Drp1 correlated genes in GSE25079.** See Supplementary\_Table\_S4

**Supplementary Table S5: Drp1 correlated genes in GSE36376.** See Supplementary\_Table\_S5

**Supplementary Table S6: Drp1 correlated genes in TCGA.** See Supplementary\_Table\_S6
